# Supplementary material for: CCR4 and CCR7 differentially regulate thymocyte localization with distinct outcomes for central tolerance
Source: eLife. 2023 Jun 2;12:e80443. doi: 10.7554/eLife.80443 (PMC10325719; doi:10.7554/eLife.80443)
Supplement: Source data 1. [file elife-80443-data1.xlsx]

## Sheet: Fig 1B
Relative Rag2p-GFP Geometric Mean Fluorescent Intensity (GMFI) of each subset normalized to pre-positive selection DP CD3-CD69- cells. Individual data points represent average GFP GMFI of the indicated subset from each mouse.
DN	DP CD3-CD69-	DP CD3loCD69+	CD4SP SM	CD4SP M1	CD4SM M2	DP CD3+CD69+	CD8SP M1	CD8SP M2
0.4479	1	0.988189	0.851079	0.502708	0.265873	0.678892	0.34766	0.180357
0.382	1	0.988735	0.829137	0.513158	0.292219	0.700871	0.369368	0.195759
0.4149	1	0.967531	0.832873	0.507726	0.286056	0.667403	0.355868	0.17706
0.4126	1	0.991574	0.841368	0.509896	0.29659	0.667353	0.380658	0.191358
0.45	1	0.99548	0.870776	0.581921	0.318336	0.677658	0.387365	0.184284
0.46	1	1.00529	0.892236	0.604762	0.33642	0.691157	0.445914	0.212272
0.434569	1	0.99792	0.841055	0.550113	0.2934	0.669062	0.373582	0.178328
0.418019	1	1.00806	0.849403	0.551066	0.286399	0.678604	0.368738	0.172737
0.44	1	1.00751	0.853217	0.57159	0.30633	0.701801	0.392795	0.189398
0.46	1	1.00715	0.866105	0.578363	0.303531	0.703083	0.396458	0.195882

## Sheet: Fig 1D CCR4+
Quantification of the percentage of cells of the indicated subset that express CCR4.
DP CD3-CD69-	DP CD3loCD69+	CD4SP SM	CD4SP M1	CD4SM M2	DP CD3+CD69+	CD8SP M1	CD8SP M2
3.11	82.3	51	4.65	0.23	10.6	0.25	0.13
3.5	80	52.5	4.75	0.39	10.4	0.42	0.13
3.42	82.9	53.8	4.49	0.45	8.1	0.28	0.23
3.32	83.3	49.9	2.97	0.26	8.17	0.22	0.17
DP CD3-CD69-	DP CD3loCD69+	CD4SP SM	CD4SP M1	CD4SM M2	DP CD3+CD69+	CD8SP M1	CD8SP M2
4.14	86.9	48.3	4.44	1.19	22.2	0.06	0.086
4.02	86.5	58.4	6.97	1.06	15.8	0.4	0
4.08	87.6	54.8	7.48	1.03	19.5	0	0.12
4.39	86.9	52.5	7.15	1.17	14	0.32	0.079
DP CD3-CD69-	DP CD3loCD69+	CD4SP SM	CD4SP M1	CD4SM M2	DP CD3+CD69+	CD8SP M1	CD8SP M2
4.66	88.1	59.3	6.66	0.67	25.1	0.47	0.16
5.16	89	58.7	6.61	0.51	27.5	0.66	0.12
DP CD3-CD69-	DP CD3loCD69+	CD4SP SM	CD4SP M1	CD4SM M2	DP CD3+CD69+	CD8SP M1	CD8SP M2
2.49	82	59.3	7.55	0.58	33.5	0.93	0.12
3.53	87.6	61.5	7.53	0.64	26.9	1.02	0.13

## Sheet: Fig 1D CCR4+CCR7+
Quantification of the percentage of cells of the indicated subset that express both chemokine receptors.
DP CD3-CD69-	DP CD3loCD69+	CD4SP SM	CD4SP M1	CD4SM M2	DP CD3+CD69+	CD8SP M1	CD8SP M2
0.00477	1.14	45.9	28.2	0.52	61.2	4.65	0.24
0.00701	1.26	42	23.6	0.46	60.2	4.1	0.18
0.00567	1.24	42	26.6	0.32	62	4.47	0.18
0.00546	1.31	44.9	25	0.42	57.1	5.33	0.097
0.03	2.1	50.5	58	4.83	64.1	22	2.2
0.023	2.44	40.7	58	5.06	68.2	19.8	1.9
0.02	2.33	44.1	58.7	5.71	66.5	19.8	1.73
0.033	3.54	46.1	59.8	7.21	68.3	22.6	2.93
0.025	1.59	36.3	26.7	0.71	39.3	3.12	0.2
0.027	1.72	37.5	30.7	0.82	42.4	3.28	0.21
0.01	1.25	36.5	32.7	1.39	38.6	3.91	0.22
0.014	2.31	33.2	27.8	0.93	37.4	2.89	0.27

## Sheet: Fig 1D CCR7+
Quantification of the percentage of cells of the indicated subset that express CCR7.
DP CD3-CD69-	DP CD3loCD69+	CD4SP SM	CD4SP M1	CD4SM M2	DP CD3+CD69+	CD8SP M1	CD8SP M2
0.046	0.23	2.21	55.2	81.1	26.7	77	49.1
0.043	0.21	3.43	53.5	72.2	27.9	67.4	43.1
0.029	0.22	2.56	53.8	74.4	28.5	73.4	42.4
0.018	0.25	3.83	63.2	81.2	33.6	77.1	41.5
0.04	0.18	0.74	32.2	70.2	8.45	51.6	29.2
0.049	0.19	0.4	26.3	60	8.81	41.3	20.9
0.038	0.12	0.52	25.4	61.4	7.07	40.9	19.8
0.065	0.24	0.58	25.6	62.1	9.51	42.2	24.1
0.17	0.48	3.5	57.4	67.5	27.4	59.3	24.6
0.21	0.39	2.96	53.7	64.5	23.8	57.6	22.2
0.19	0.36	3.21	48.5	59.9	19.5	53.1	21.7
0.16	0.74	3.75	49.9	54.8	25.1	49.8	18.8

## Sheet: Fig1 --supplemental figure 1A
	Quantification of the GFP MFI of the indicated thymocyte subsets from Nr4a1GFP mice.
GFP+	DP CD3- CD69- | Median (Nur77)	DP CD3lo CD69+ | Median (Nur77)	DP CD3+ CD69+ | Median (Nur77)	CD4SP SM | Median (Nur77)	CD4SP M1 | Median (Nur77)	CD4SP M2 | Median (Nur77)	CD4SP CD25+ | Median (Nur77)	CD8SP M1 | Median (Nur77)	CD8SP M2 | Median (Nur77)
	372	12323	14241	12438	19542	11079	52194	10952	5365
	348	10087	10483	11800	20617	11613	50043	13544	5486
	321	8336	11045	11936	20424	11197	49559	13956	5737
	324	9136	11507	11377	19901	11171	48607	13083	4246
GFP-	138	137	167	148	176	209	165	190	235
	109	108	97.7	92.5	71.9	112	70.6	135	181
	102	102	122	111	122	170	127	162	216

## Sheet: Fig1 --supplemental figure 1C
Quantification of the frequency of DP CD3+CD69+ in all DP thymocytes from wild-type, B2m-/-, and H2-/- mice.
WT	β2m-/-	MHCII-/-
0.79	0.24	1.23
0.4	0.21	1.43
0.38	0.051	1.28
	0.033	1.22

## Sheet: Fig1 --supplemental figure 2B
Quantification of the CCR7 MFI within each subset from data in A
	CD3- CD69- | Median (CCR7)	CD3lo CD69+ | Median (CCR7)	CD4SP SM | Median (CCR7)	CD4SP M1 | Median (CCR7)	CD4SP M2 | Median (CCR7)	CD3+ CD69+ | Median (CCR7)	CD8SP M1 | Median (CCR7)	CD8SP M2 | Median (CCR7)
WT	37	93.9	636	1988	1169	1363	1237	431
	-7.39	61.6	1460	3699	2182	2097	2013	490
	-22.2	44.4	1339	3403	1888	2002	1919	475
	-30.4	40.2	1250	3548	2067	2024	2101	565
CCR7KO	32	30.4	37	46	50.9	46	63.3	69.1
	-45.2	-20.5	18.1	0.82	-43.5	-4.1	-24.6	-37
	-39.4	-21.3	12.3	0.82	-38.6	-7.39	-30.4	-37
	-39.4	-20.5	14.8	4.93	-35.3	-11.5	-24.6	-30.4

## Sheet: Fig1 --supplemental figure 2C
Quantification of CCR7 MFIs for each thymocyte subset after incubation at 37°C for the indicated times, prior to antibody staining at 4°C.
	DP CD3- CD69- | Median (CCR7)	DP CD3lo CD69+ | Median (CCR7)	CD4SP SM | Median (CCR7)	CD4SP M1 | Median (CCR7)	CD4SP M2 | Median (CCR7)	DP CD3+ CD69+ | Median (CCR7)	CD8SP M1 | Median (CCR7)	CD8SP M2 | Median (CCR7)
20221116_01_WT_0 min.fcs	-44.9	-19.3	366	1018	436	591	564	105
	-30.8	-7.7	354	972	421	565	473	126
20221116_01_WT_30 min.fcs	-61.6	-39.4	200	444	173	258	179	-13.1
	-67.4	-43.5	193	415	146	234	154	-22.2
	-69.9	-52.6	169	428	174	237	180	-9.03
	-47.5	-12.8	336	923	406	528	497	116
	-28.2	8.98	317	816	398	477	414	99
20221116_01_WT_60 min.fcs	-65.8	-42.7	172	379	111	230	130	-29.6
	-82.3	-55.9	156	341	83.9	189	104	-64.9
	-55.1	-32.8	174	416	156	243	189	3.28
	-80.9	-60.4	412	1285	543	417	622	131
	-62.9	-46.2	409	1220	522	389	565	117
20221116_01_WT_90 min.fcs	-64.9	-42.7	159	414	124	279	146	-23.8
	-63.3	-37	151	407	115	283	143	-23
	-66.6	-46.8	140	421	138	277	177	-27.9
	-18	33.4	248	666	263	487	366	109
	-11.6	29.5	259	646	253	447	350	96.4
20221116_01_WT_120 min.fcs	-68.2	-54.2	183	543	194	352	217	-5.75
	-64.9	-44.4	168	481	163	329	197	-0.82
	-64.1	-51.8	161	532	216	348	257	24.6
	-19.3	27	301	948	399	668	528	160
	-23.1	12.8	331	1020	440	611	484	149

## Sheet: Fig1 --supplemental figure 2D
Quantification of CCR4 MFIs for each thymocyte subset after incubation at 37°C for the indicated times, prior to antibody staining at 4°C.
	DP CD3- CD69- | Median (CCR7)	DP CD3lo CD69+ | Median (CCR7)	CD4SP SM | Median (CCR7)	CD4SP M1 | Median (CCR7)	CD4SP M2 | Median (CCR7)	DP CD3+ CD69+ | Median (CCR7)	CD8SP M1 | Median (CCR7)	CD8SP M2 | Median (CCR7)
20221116_01_WT_0 min.fcs	30.8	1509	2037	387	2.57	779	84.8	-16.7
	37.2	1484	2132	388	10.3	835	70.6	-12.8
20221116_01_WT_30 min.fcs	15.6	796	1073	164	0.82	405	47.6	-3.28
	16.4	828	1020	153	-0.82	395	46	-0.82
	16.4	845	1078	175	2.46	418	56.7	-0.82
	12.8	996	1350	265	-5.13	527	43.6	-15.4
	24.4	976	1345	257	8.98	491	53.9	-2.57
20221116_01_WT_60 min.fcs	11.5	664	918	144	-0.82	344	39.4	-3.28
	7.39	671	867	138	-7.39	324	33.7	-11.5
	18.9	713	941	166	9.03	362	55.9	9.03
	-1.28	929	1693	328	-27	888	38.5	-33.4
	8.98	910	1791	335	-10.3	914	41.1	-23.1
20221116_01_WT_90 min.fcs	13.1	598	879	148	0	313	40.2	-1.64
	17.2	611	832	146	2.46	301	42.7	0.82
	17.2	616	867	168	7.39	311	50.1	1.64
	41.1	690	968	246	38.5	362	77.1	41.1
	27	657	994	221	20.5	352	47.5	15.4
20221116_01_WT_120 min.fcs	10.7	569	944	173	-2.46	338	30.4	-3.28
	13.1	563	862	157	1.64	304	36.1	-2.46
	18.9	581	883	179	9.03	318	46.8	4.1
	19.3	653	1020	257	15.4	363	55.2	8.98
	19.3	707	1181	274	14.1	420	42.4	3.85

## Sheet: Fig 2A CCL17
Transwell assays were used to quantify chemotaxis of thymocyte subsets to the indicated concentrations of the CCR4 ligands CCL17 .
	Blank									100nM CCL17									10nM CCL17									1nM CCL17
DP CD3-CD69-	1.04038	1.08849	0.871125	1.60324	0.717743	0.67902	1.52323	0.840732	0.636038	0.989034	0.868789	0.393938	0.970475	0.636258	0.848279	0.727573	0.34259	0.426919	0.754752	0.634354	0.59134	0.610741	0.673281	0.655065	0.447721	0.42334	0.698344	0.848069	0.856691	0.626468	0.660432	0.701354	1.02598	0.62714	0.719264	0.698844
DP CD3loCD69+	0.951095	0.972832	1.07607	1.22014	0.750998	1.02886	1.19528	0.914382	0.890335	1.34412	1.49353	1.25217	0.761128	0.852893	0.949655	0.830149	0.791513	0.869036	1.28432	1.05759	1.2718	1.09305	1.25898	1.16318	0.910638	0.941627	1.10931	1.16953	1.19061	1.20653	1.02806	0.858959	1.57539	1.04867	1.23548	0.936343
CD4SP SM	1.06598	1.00454	0.929473	1.25972	0.773745	0.966536	1.06542	0.955175	0.979405	1.09465	1.00889	1.04705	0.745841	1.01266	1.13513	1.11538	1.01795	0.89699	1.04588	0.888615	1.06869	1.13914	1.00407	0.944599	0.960905	1.04287	1.10279	0.971276	1.00365	1.01338	1.09104	1.03224	1.44375	1.11963	1.31007	1.12858
CD4SP M1	0.961861	0.939631	1.09851	1.12542	0.89213	0.982447	0.591884	1.27304	1.13507	0.973113	0.975675	0.93091	0.941905	1.22162	0.942905	0.714965	0.487947	0.625661	0.940109	0.477046	0.642185	0.956759	0.901638	0.953705	0.783401	1.14888	0.622438	0.91079	0.902484	0.922355	0.811155	0.987515	1.06268	1.04983	1.15981	0.913948
CD4SP M2	1.48659	0.74695	0.766457	1.54528	0.546765	0.907956	1.38065	0.615427	1.00392	0.67212	0.788679	0.71009	0.356688	0.936651	1.02735	0.915411	0.548023	0.194592	1.00148	0.572915	0.82609	0.731488	0.712912	0.933801	0.304565	0.34839	0.734026	0.758947	0.70239	0.796002	0.787134	0.755002	1.30948	1.06118	1.11905	0.615884
DP CD3+CD69+	1.20497	0.967988	0.827047	1.3357	0.455106	1.2092	0.985393	0.94836	1.06625	1.24775	0.830762	1.43117	1.03913	2.19271	1.60336	1.16055	0.684483	1.04163	1.20072	0.871827	0.949169	1.54557	2.26571	1.99867	0.869492	1.19146	1.35649	0.930617	1.11582	0.874833	0.982769	3.04549	2.6159	0.89939	1.14098	1.05313
CD8SP M1	0.724222	1.06385	1.21193	1.73611	0.253516	1.01037	0.864573	0.788287	1.34714	1.49987	0.779417	1.5245	1.48845	1.46574	0.535889	0.905111	1.28691	0.456956	0.76978	1.37192	1.1112	0.939227	0.270452	1.39169	1.14432	1.63623	0.246243	2.06828	0.647866	1.52961	0.821175	0.727064	0.546444	0.498388	0.500542	0.964178
CD8SP M2	0.261269	1.91896	0.819776	1.91493	0.434977	0.650089	1.49577	0.727353	0.776879	0.811634	1.68709	0.305541	0.425642	0	0.229867	0.31318	0	0	0.833113	0.274961	0.572676	0.805752	0.464035	0.238783	0.593926	0	0	1.72188	0.876461	0.827727	0	0.415827	0.468788	0.517346	1.03916	0

[truncated: 66 more sheets: Fig 2B CCL22, Fig 2C CCL19, Fig 2D CCL21, Fig2 --supplemental figure 1A, Fig2 --supplemental figure 2A, Fig 3B, Fig 3C, Fig 4C CCR4+, Fig 4C CCR4+CCR7+, Fig 4E, Fig4 --supplement1B top left, Fig4 --supplement1B top right, Fig4 --supplement1B bottom left, Fig4 --supplement1B bottom righ, Fig4 --supplement1C left, Fig4 --supplement1C right, Fig4 --supplement1E, Fig 5B DP CD3loCD69+, Fig 5B CD4SP SM, Fig 5B CD4SP M1+M2 …]
